# Supplementary material for: Teaching and Evolution in Surgical Planning of Robotic Partial Nephrectomy with 3d Printing Models
Source: Research Square preprint supplement (doi:10.21203/rs.3.rs-7637276/v1), 2025-10-10
Supplement: Supplementary file 1 [file bc0ada8a494b9851a53ce4ab.docx]

**APPENDICES**

**Appendix I** Results of ease-of-use survey (S4).

| **Results of Ease-of-use survey, S4** | | | | | |
| --- | --- | --- | --- | --- | --- |
| % (n) | | | | | |
| **Was the 3D model used for surgical planning prior to the procedure?** | | | | | |
| Yes 78.5% (44) | | | No 21,4% (12) | | |
| **Was the 3D model employed as a tool for communication with the patient?** | | | | | |
| Yes 14.2% (8) | | | No 85.8% (48) | | |
| **Did you use the 3D model as a guide during the surgical procedure?** | | | | | |
| Yes 91.1% (51) | | | No 8.9% (5) | | |
| **In your opinion, was the surgical time reduced with the use of the 3D model?** | | | | | |
| 1 Disagree  28.5% (16) | 2  21.4% (12) | | 3  28.5% (16) | 4  16.2% (9) | 5 Strongly agree  5.3% (3) |
| **In your opinion do the model accurately reflects the anatomy encountered during the surgical procedure?** | | | | | |
| 1 Disagree  5.35% (3) | 2  3.6% (2) | | 3  12.6% (7) | 4  26.7% (15) | 5 Strongly agree  51.7% (29) |
| **In your opinion, has the model enhanced the assessment of vascular anatomy?** | | | | | |
| 1 Disagree  19.3% (10) | 2  0% (0) | | 3  10.5% (6) | 4  28.1% (16) | 5 Strongly agree  42.1% (24) |
| **In your opinion, do the model has improved the evaluation of tumor depth?** | | | | | |
| 1 Disagree  10.71% (6) | 2  0% (0) | | 3  29% (16) | 4  25.5% (14) | 5 Strongly agree  34% (19) |
| **In your opinion, has the use of the model contributed to more accurate localization of the tumor?** | | | | | |
| 1 Disagree  5.36% (3) | 2  5.36% (3) | | 3  25% (14) | 4  30.35% (17) | 5 Strongly agree  33.92% (19) |
| **In your opinion, a virtual model of 3D would be enough?** | | | | | |
| 1 Disagree  35.71% (20) | | 2  25% (14) | 3  25% (14) | 4  12.5% (7) | 5 Strongly agree  1.7% (1) |
| **Are there any other factors in which the use of the model may have had a positive impact?** | | | | | |
| No further improvements  12.5% (9) | | Improved the security sense in surgical planning  51.38% (37) | Reduced stress during surgery  27.78% (20) | Resulted in less bleeding  2.78% (2) | Others  5.56% (4) |

**Appendix II** Comparison between surgical planning complete survey S1, S2, S3.

Q: questions; prof: professional; R: resident; S: senior staff; J: junior staff; p: p-value; S1: survey with TC-2D; S2: survey with TC-3D; S3: survey with printing 3D.

|  | **S1 vs S2** | | | | | **S1 vs S3** | | | | | **S2 vs S3** | | | | |
| --- | --- | --- | --- | --- | --- | --- | --- | --- | --- | --- | --- | --- | --- | --- | --- |
| % changed answers (n) | | | | | | | | | | | | | | |
| Prof | Global | R | S | J | *p* | Global | R | S | J | *p* | Global | R | S | J | *p* |
| Q1 | 5.48 (8) | 5.32 (5) | 6.82 (3) | 0  (0) | 0.817 | 12.12 (16) | 12.64 (11) | 10.53 (4) | 14.29 (1) | 1.0 | 8.46 (11) | 9.41 (8) | 5.41 (2) | 12.50 (1) | 0.559 |
| Q2 | 14.38 (21) | 13.83 (13) | 15.91 (7) | 12.50 (1) | 0.937 | 15.91 (21) | 18.39 (16) | 10.53 (4) | 14.29 (1) | 0.538 | 15.38 (20) | 14.12 (12) | 18.92 (7) | 12.50 (1) | 0.774 |
| Q3 | 14.38 (21) | 9.57 (9) | 25.00 (11) | 12.50 (1) | 0.054 | 19.70 (26) | 12.64 (11) | 36.84 (14) | 14.29 (1) | **0.007** | 9.23 (12) | 7.06 (6) | 13.51 (5) | 12.50 (1) | 0.361 |
| Q4.1 | 19.86 (29) | 18.09 (17) | 22.73 (10) | 25.00 (2) | 0.761 | 21.21 (28) | 21.84 (19) | 18.42 (7) | 28.57 (2) | 0.808 | 19.23 (25) | 21.18 (18) | 16.22 (6) | 12.50 (1) | 0.72 |
| Q4.2 | 43.84 (64) | 39.36 (37) | 61.36 (27) | 0 (0) | **0.001** | 56.82 (75) | 58.62 (51) | 63.16 (24) | 0 (0) | **0.005** | 43.08 (56) | 44.71 (38) | 45.95 (17) | 12.5 (1) | 0.23 |
| Q5 | 30.14 (44) | 25.53 (24) | 40.91 (18) | 25 (2) | 0.19 | 36.36 (48) | 32.18 (28) | 42.11 (16) | 57.14 (4) | 0.26 | 21.54 (28) | 16.47 (14) | 29.73 (11) | 37.5 (3) | 0.13 |
| Q6 | 15.75 (23) | 14.89 (14) | 20.45 (9) | 0  (0) | 0.319 | 22.73 (30) | 19.54 (12) | 31.58 (12) | 14.29 (1) | 0.289 | 19.23 (25) | 17.65 (15) | 24.32 (9) | 12.50 (1) | 0.61 |
| Q7.1 | 22.60 (33) | 24.47 (23) | 20.45 (9) | 12.5 (1) | 0.74 | 35.61 (47) | 41.38 (36) | 18.42 (7) | 57.14 (4) | **0.014** | 30.00 (39) | 30.59 (26) | 27.03 (10) | 37.5 (3) | 0.82 |
| Q7.2 | 37.67 (55) | 37.23 (35) | 36.36 (16) | 50 (4) | 0.77 | 43.18 (57) | 43.68 (38) | 42.11 (16) | 42.86 (3) | 1.0 | 36.92 (48) | 34.12 (29) | 48.65 (18) | 12.5 (1) | 0.10 |
| Q7.3 | 10.27 (15) | 8.51 (8) | 13.64 (6) | 12.50 (1) | 0.44 | 14.39 (19) | 16.09 (14) | 10.53 (4) | 14.29 (1) | 0.717 | 10.77 (14) | 14.12 (12) | 5.41 (2) | 0  (0) | 0.255 |
| Q7.4 | 19.86 (29) | 13.83 (13) | 27.27 (12) | 50 (4) | **0.016** | 20.45 (27) | 21.84 (19) | 18.42 (7) | 14.29 (1) | 0.83 | 20.00 (26) | 20 (17) | 16.22 (6) | 37.5 (3) | 0.39 |
| Q7.5 | 13.01 (19) | 10.64 (10) | 18.18 (8) | 12.50 (1) | 0.47 | 23.48 (31) | 22.99 (20) | 28.95 (11) | 0  (0) | 0.247 | 22.31 (29) | 22.35 (19) | 27.03 (10) | 0  (0) | 0.25 |
| Q8 | 15.07 (22) | 15.96 (15) | 15.91 (7) | 0  (0) | 0.472 | 21.21 (28) | 18.39 (16) | 31.58 (12) | 0  (0) | 0.093 | 16.92 (22) | 14.12 (12) | 27.03 (10) | 0  (0) | 0.091 |
| Q9 | 10.96 (16) | 8.51 (8) | 18.18 (8) | 0  (0) | 0.171 | 15.15 (20) | 12.64 (11) | 23.68 (9) | 0  (0) | 0.147 | 8.46 (11) | 8.24 (7) | 10.81 (4) | 0  (0) | 0.871 |
